# Supplementary material for: An experimental phylogeny to benchmark ancestral sequence reconstruction
Source: PubMed Central journal article supplement (PMC5027606; doi:10.1038/ncomms12847), 2016-09-15
Supplement: ncomms12847-s1.pdf [file ncomms12847-s1.pdf]

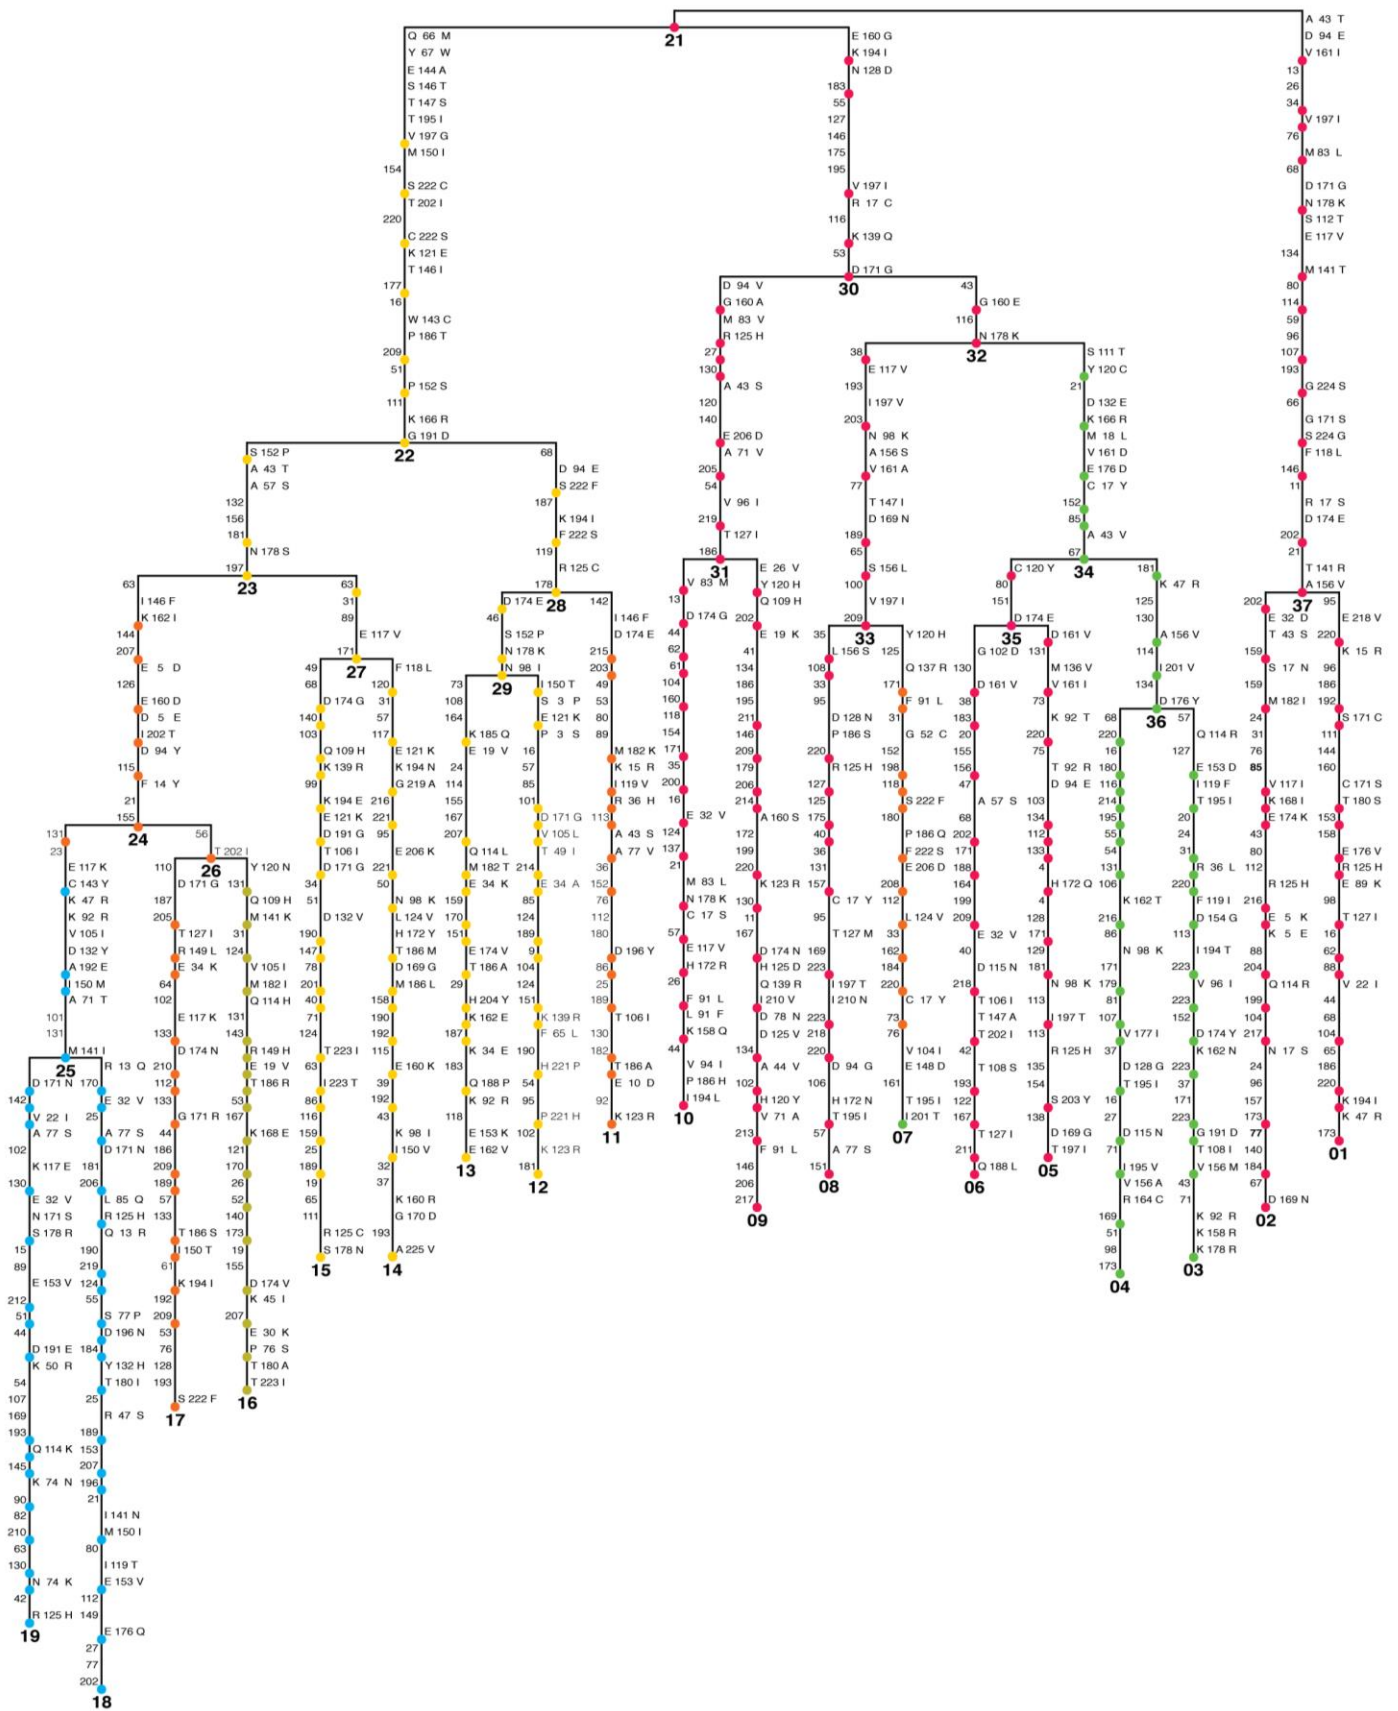

**Supplementary Figure 1. Distribution of mutations in the experimental phylogeny.** Leaf and node numbers are provided at each tip and bifurcation point on the tree, respectively. Nonsynonymous mutations are listed to the right of each branch and synonymous mutations to the left. Nonsynonymous mutations also list the amino acid replacement. Each filled circle represents one round of random-mutagenesis PCR and the color of the circle represents the color-class phenotype of the FP protein at that location in the tree.

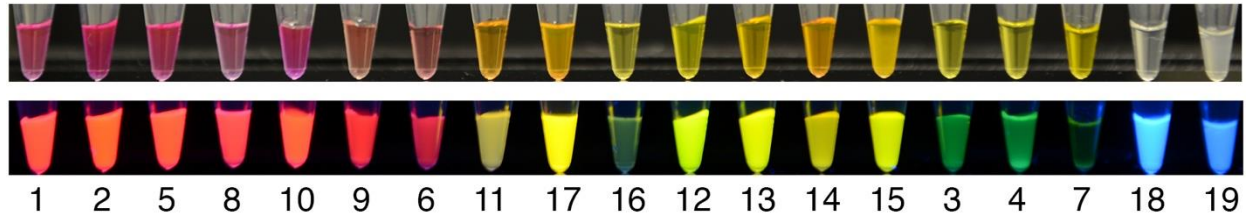

**Supplementary Figure 2. Diversity of phenotypes displayed by the leaf ('modern') sequences of the phylogeny.** Purified proteins from sequences 1-19 are arranged by color-class phenotype and are shown in visible light (top image) and 365 nm UV light (bottom image).

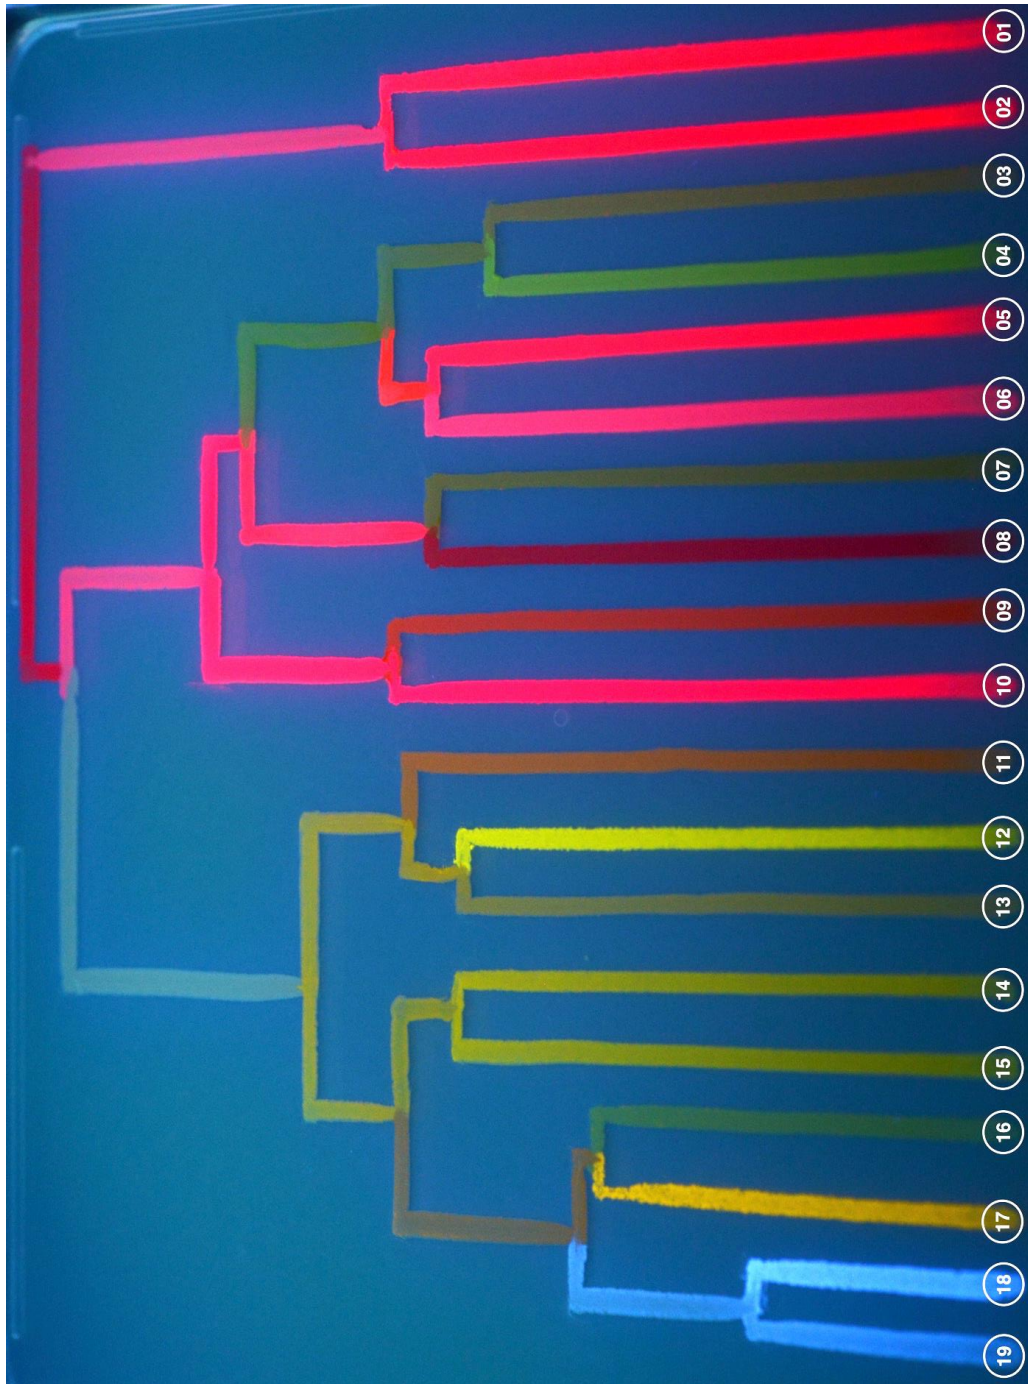

**Supplementary Figure 3. Evolution of color emission in the experimental phylogeny.** Cladogram drawn with bacteria growing on an agar plate expressing either a node or leaf fluorescent protein and visualized under 365 nm ultraviolet light. Topology is a representation of the true topology shown in the phylogram (Supplementary Fig. 1).

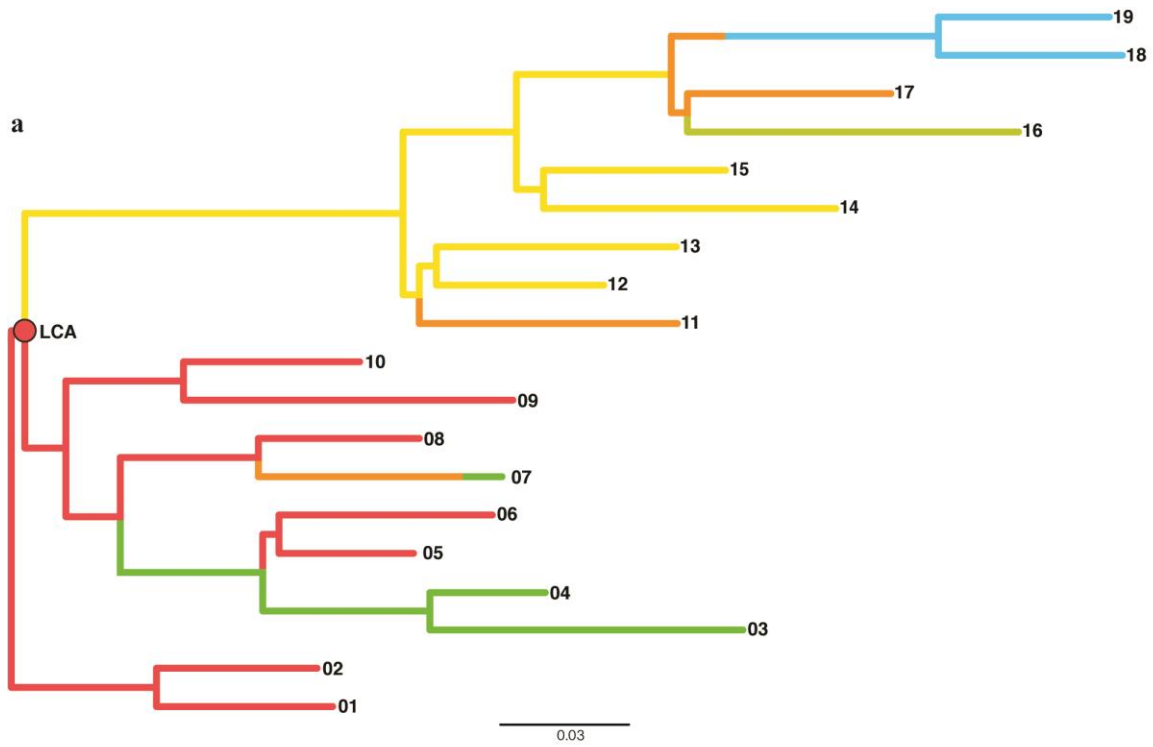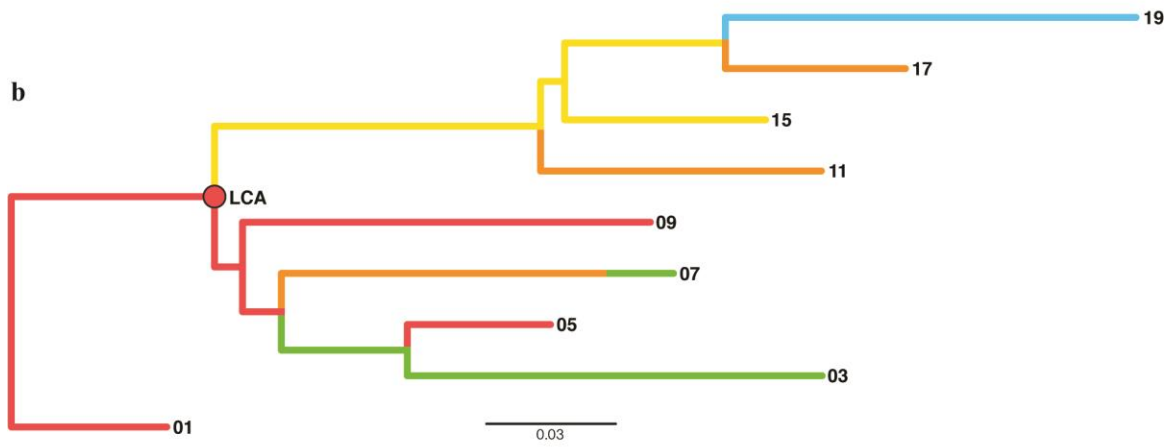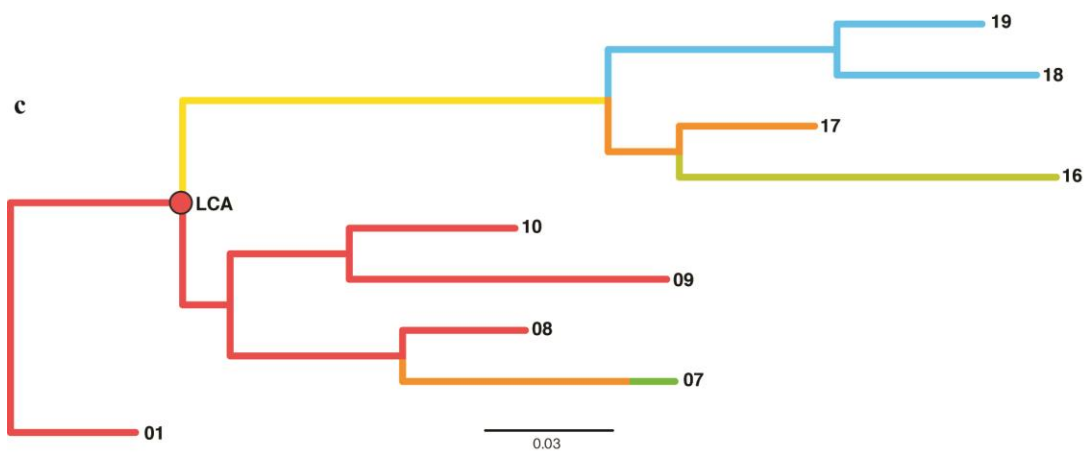

**d**

```
TrueLCA      MASSEdVIKEfMRFKvRMEGSVNGHEFEIEGEGEGRPYEGTQAAKLKvTKGGPLPFAWDI
PAML all 19  MASSEdVIKEfMRFKvSMEGSVNGHEFEIEGEGEGRPYEGTQSAKLKvTKGGPLPFAWDI
PAML Sub1    MASSEdVIKEfMRFKvSMEGSVNGHEFEIEGEGEGRPYEGTQAAKLKvTKGGPLPFAWDI
PAML Sub2    MASSEdVIKEfMRFKvSMEGSVNGHEFEIEGEGEGRPYEGTQAAKLKvTKGGPLPFAWDI
*****      *****:*****

TrueLCA      LSPQfQYgSKAYvKHPADIPDYMkLSfPEgFKWDRVMNFEDGGVvTVtQDSSlQDGEfIY
PAML all 19  LSPQfQYgSKAYvKHPADIPDYMkLSfPEgFKWDRVMNFEDGGVvTVtQDSSlQDGEfIY
PAML Sub1    LSPQfQYgSKAYvKHPADIPDYMkLSfPEgFKWDRVMNFEDGGVvTVtQDSSlQDGEfIY
PAML Sub2    LSPQfQYgSKAYvKHPADIPDYMkLSfPEgFKWDRVMNFEDGGVvTVtQDSSlQDGEfIY
*****      *****:*****

TrueLCA      KVKLRGTnFpSDGpVMQkKtMGWEASTERMyPEDGALKGEvKMRlKlKdGDHYDAEVNTT
PAML all 19  KVKLRGTnFpSDGpVMQkKtMGWEASTERMyPEDGALKGEvKMRlKlKdGCHYDAEVNTT
PAML Sub1    KVKLRGTnFpSDGpVMQkKtMGWEASTERMyPEDGALKGEvKMRlKlKdGCHYDAEVNTT
PAML Sub2    KVKLRGTnFpSDGpVMQkKtMGWEASTERMyPEDGALKGEvKMRlKlKdGSHYDAEVNTT
****. * *****:****

TrueLCA      YMAKKpVQLPGAYkTDvKLDITSHNEDYTIvEQYERAEGRHSTGA
PAML all 19  YMAKKpVQLPGAYkTDvKLDITSHNEDYTIvEQYERAEGRHSTGA
PAML Sub1    YMAKKpVQLPGAYkTDvKLDITSHNEDYTIvEQYERAEGRHSTGA
PAML Sub2    YMAKKpVQLPGAYkTDvKLDITSHNEDYTIvEQYERAEGRHSTGA
*****      *****:*****
```

**Supplementary Figure 4. The effects of taxon sampling on the inference of the last common ancestral sequence.** (a) Full phylogeny from Fig. 1 in the main article. (b) Subsample of sequences across the entire spectrum of the full phylogeny used to infer the last common ancestor (LCA). (c) Subsample of sequences composed of clusters from the full phylogeny used to infer the LCA. Scale bars represents amino acid replacements per site per unit evolutionary time. Color corresponds to Fig.1 from the main article. (d) Multiple sequence alignment of LCAs from the different analyses; true ancestor, PAML inferred using all of the 19 leaf sequences, PAML using sequences from **b** (Subsample1), PAML using sequences from **c** (Subsample2). Inferred residues that differ from the true ancestral residues are highlighted in magenta. The sites of the highlighted positions are 17, 43, 94, 117, 125, 127, 171, 174, 178, 194 and 197.



**a**

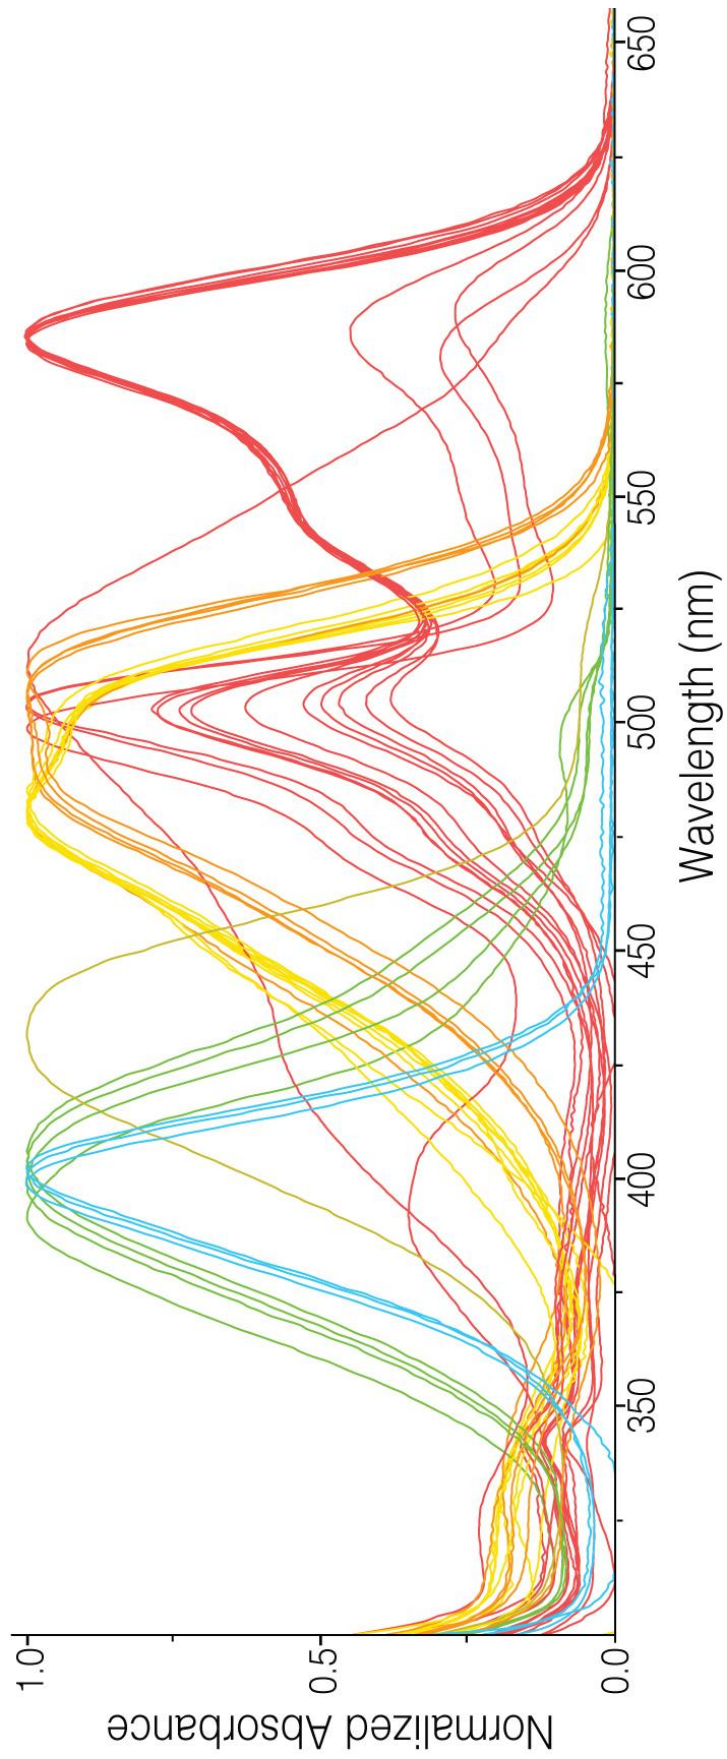

**b**

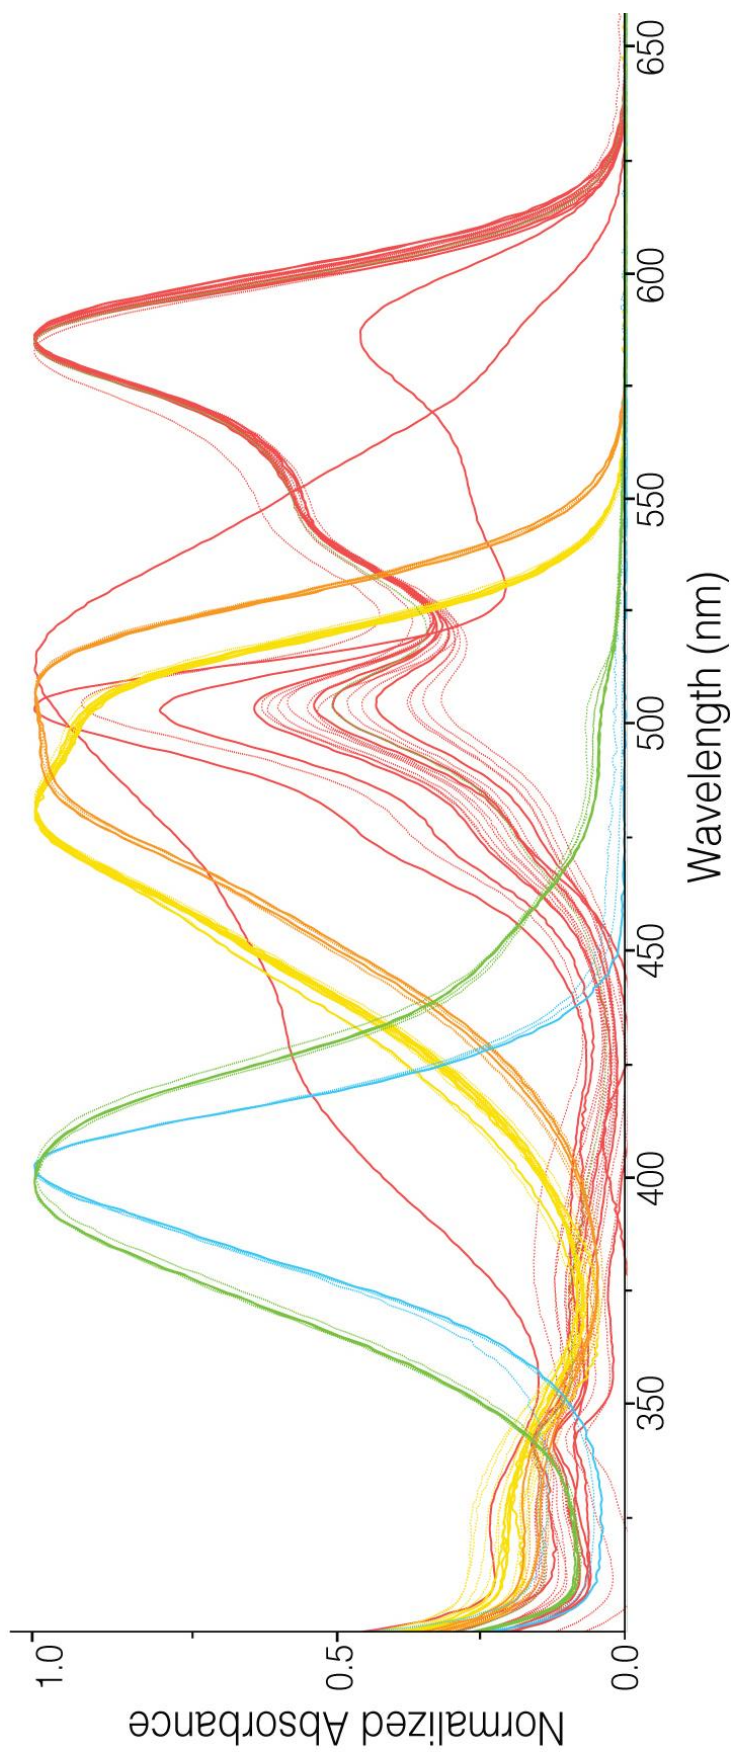



**Supplementary Figure 5. Absorbance spectra for all 70 proteins characterized in the study.** (a) Absorbance spectra for true ancestors and leaves of phylogeny. Color of spectral line represents color-class of encoded protein. (b) Absorbance spectra for true ancestors (solid lines) and incorrectly inferred ancestors (dotted lines).

**Supplementary Table 1. Summary statistics for the experimental phylogeny.** (a) Total mutations and types of mutations accumulated in the phylogeny. (b) A list of specific nucleotide substitution types and occurrences in the phylogeny. Abbreviations ts and tv represent transitions and transversions, respectively. (c) Types of nucleotide substitutions resulting in either a synonymous (syn) or nonsynonymous (nonsyn) mutation along each individual branch of the phylogeny. Predicted ratio of nonsynonymous to synonymous mutations does not match the observed ratio because of reversion mutations.

**a**

| <b>Experimental Phylogeny Mutation Summary</b> |     |
|------------------------------------------------|-----|
| Total variants in phylogeny                    | 349 |
| Nodes                                          | 17  |
| Leaves                                         | 19  |
| Total Mutations                                | 833 |
| Transitions (ts)                               | 535 |
| Transversions (tv)                             | 298 |
| Total synonymous (syn) mutations               | 461 |
| Synonymous reversions                          | 14  |
| Observed synonymous mutations                  | 447 |
| Total nonsynonymous (nonsyn) mutations         | 372 |
| Nonsynonymous reversions                       | 19  |
| Observed nonsynonymous mutations               | 353 |

**b**

| <b>Nucleotide Substitution</b> |      |            |                |
|--------------------------------|------|------------|----------------|
| Substitution                   | Type | Occurrence | Percentage (%) |
| A --> T                        | tv   | 74         | 8.88           |
| A --> C                        | tv   | 16         | 1.92           |
| A --> G                        | ts   | 117        | 14.05          |
| T --> A                        | tv   | 72         | 8.64           |
| T --> C                        | ts   | 106        | 12.73          |
| T --> G                        | tv   | 19         | 2.28           |
| C --> T                        | ts   | 167        | 20.05          |
| C --> G                        | tv   | 17         | 2.04           |
| C --> A                        | tv   | 33         | 3.96           |
| G --> C                        | tv   | 21         | 2.52           |
| G --> T                        | tv   | 46         | 5.52           |
| G --> A                        | ts   | 145        | 17.41          |

c

| Branch number | Syn mutations | Syn reversions | Observed syn mutations | Nonsyn mutations | Nonsyn reversions | Observed nonsyn mutations | Observed nonsyn/syn | Predicted nonsyn/syn |
|---------------|---------------|----------------|------------------------|------------------|-------------------|---------------------------|---------------------|----------------------|
| 1             | 21            | 0              | 21                     | 12               | 1                 | 11                        | 0.5714              | 0.5238               |
| 2             | 24            | 1              | 23                     | 13               | 2                 | 11                        | 0.5417              | 0.4783               |
| 3             | 16            | 2              | 14                     | 17               | 1                 | 16                        | 1.0625              | 1.1429               |
| 4             | 25            | 0              | 25                     | 9                | 0                 | 9                         | 0.3600              | 0.3600               |
| 5             | 19            | 1              | 18                     | 13               | 1                 | 12                        | 0.6842              | 0.6667               |
| 6             | 21            | 0              | 21                     | 11               | 0                 | 11                        | 0.5238              | 0.5238               |
| 7             | 16            | 0              | 16                     | 14               | 1                 | 13                        | 0.8750              | 0.8125               |
| 8             | 21            | 1              | 20                     | 12               | 0                 | 12                        | 0.5714              | 0.6000               |
| 9             | 23            | 2              | 21                     | 16               | 1                 | 15                        | 0.6957              | 0.7143               |
| 10            | 18            | 1              | 17                     | 14               | 1                 | 13                        | 0.7778              | 0.7647               |
| 11            | 19            | 0              | 19                     | 13               | 0                 | 13                        | 0.6842              | 0.6842               |
| 12            | 17            | 0              | 17                     | 13               | 2                 | 11                        | 0.7647              | 0.6471               |
| 13            | 15            | 0              | 15                     | 14               | 1                 | 13                        | 0.9333              | 0.8667               |
| 14            | 19            | 2              | 17                     | 17               | 0                 | 17                        | 0.8947              | 1.0000               |
| 15            | 23            | 0              | 23                     | 13               | 1                 | 12                        | 0.5652              | 0.5217               |
| 16            | 16            | 1              | 15                     | 16               | 0                 | 16                        | 1.0000              | 1.0667               |
| 17            | 22            | 1              | 21                     | 11               | 0                 | 11                        | 0.5000              | 0.5238               |
| 18            | 21            | 1              | 20                     | 17               | 1                 | 16                        | 0.8095              | 0.8000               |
| 19            | 19            | 1              | 18                     | 14               | 1                 | 13                        | 0.7368              | 0.7222               |
| 22            | 7             | 0              | 7                      | 20               | 1                 | 19                        | 2.8571              | 2.7143               |
| 23            | 4             | 0              | 4                      | 4                | 0                 | 4                         | 1.0000              | 1.0000               |
| 24            | 7             | 0              | 7                      | 8                | 1                 | 7                         | 1.1429              | 1.0000               |
| 25            | 4             | 0              | 4                      | 10               | 0                 | 10                        | 2.5000              | 2.5000               |
| 26            | 1             | 0              | 1                      | 1                | 0                 | 1                         | 1.0000              | 1.0000               |
| 27            | 4             | 0              | 4                      | 1                | 0                 | 1                         | 0.2500              | 0.2500               |
| 28            | 4             | 0              | 4                      | 5                | 1                 | 4                         | 1.2500              | 1.0000               |
| 29            | 1             | 0              | 1                      | 4                | 0                 | 4                         | 4.0000              | 4.0000               |
| 30            | 8             | 0              | 8                      | 7                | 0                 | 7                         | 0.8750              | 0.8750               |
| 31            | 8             | 0              | 8                      | 9                | 0                 | 9                         | 1.1250              | 1.1250               |
| 32            | 2             | 0              | 2                      | 2                | 0                 | 2                         | 1.0000              | 1.0000               |
| 33            | 8             | 0              | 8                      | 9                | 1                 | 8                         | 1.1250              | 1.0000               |
| 34            | 4             | 0              | 4                      | 9                | 0                 | 9                         | 2.2500              | 2.2500               |
| 35            | 2             | 0              | 2                      | 2                | 0                 | 2                         | 1.0000              | 1.0000               |
| 36            | 5             | 0              | 5                      | 4                | 0                 | 4                         | 0.8000              | 0.8000               |
| 37            | 17            | 0              | 17                     | 18               | 1                 | 17                        | 1.0588              | 1.0000               |
| Average       |               |                |                        |                  |                   |                           | 1.0510              | 1.0267               |

**Supplementary Table 2. Percentage of sites correctly inferred for the five tested ASR procedures.** Procedures follow the color-code scheme (Fig. 2 in main article).

| <b>Method</b> | <b>Correctly Inferred Sites</b> | <b>Incorrectly Inferred Sites</b> | <b>Total Sites</b> |
|---------------|---------------------------------|-----------------------------------|--------------------|
| PAML_Γ        | 98.14%                          | 71                                | 3825               |
| FASTML_Γ      | 98.17%                          | 70                                | 3825               |
| PAML          | 98.12%                          | 72                                | 3825               |
| PHYLO_Γ       | 97.88%                          | 81                                | 3825               |
| MP            | 98.07%                          | 74                                | 3825               |

**Supplementary Table 3. (a)** Phenotypes of true ancestors and incorrectly inferred ancestors. Extinction coefficient ( $\epsilon$ ), quantum yield ( $\Phi$ ), brightness ( $\epsilon \times \Phi$ ), excitation maxima ( $\lambda_{ex}$ ), and emission maxima ( $\lambda_{em}$ ). The percent error equals zero when the inferred sequence is identical to the ancestral sequence. **(b)** Phenotypes for all 19 leaf proteins. **(c)** Summary of phenotypic error for each ASR procedure. Note, nodes 34 and 35 are not included because they outweigh all other error (but their errors are the same for the five procedures so the overall effect is negligible). Procedures follow the color-code scheme (Supplementary Table 2a, c, Fig. 2).

**a**

| Node     | $\Sigma$<br>( $M^3cm^{-1}$ ) | $\Sigma$<br>Error | $\sqrt{\phantom{x}}$ | $\sqrt{\phantom{x}}$<br>Error | $\lambda_{ex}$<br>(nm) | $\lambda_{ex}$<br>Error | $\lambda_{em}$<br>(nm) | $\lambda_{em}$<br>Error | Brightness | Brightness<br>Error |
|----------|------------------------------|-------------------|----------------------|-------------------------------|------------------------|-------------------------|------------------------|-------------------------|------------|---------------------|
| 21       | 19,003                       | -                 | 0.1213               | -                             | 586                    | -                       | 608                    | -                       | 2,306      | -                   |
| PAML_Γ   | 36,317                       | 91.11%            | 0.2567               | 111.53%                       | 585                    | 0.17%                   | 604                    | 0.66%                   | 9,322      | 304.25%             |
| FASTML_Γ | 36,317                       | 91.11%            | 0.2567               | 111.53%                       | 585                    | 0.17%                   | 604                    | 0.66%                   | 9,322      | 304.25%             |
| PAML     | 36,317                       | 91.11%            | 0.2567               | 111.53%                       | 585                    | 0.17%                   | 604                    | 0.66%                   | 9,322      | 304.25%             |
| PHYLO_Γ  | 36,317                       | 91.11%            | 0.2567               | 111.53%                       | 585                    | 0.17%                   | 604                    | 0.66%                   | 9,322      | 304.25%             |
| MP       | 46,312                       | 143.71%           | 0.2532               | 108.62%                       | 585                    | 0.17%                   | 606                    | 0.33%                   | 11,724     | 408.43%             |
| 22       | 7,307                        | -                 | 0.0710               | -                             | 486                    | -                       | 549                    | -                       | 519        | -                   |
| PAML_Γ   | 18,524                       | 153.51%           | 0.0659               | 7.22%                         | 486                    | 0.00%                   | 546                    | 0.55%                   | 1,221      | 135.21%             |
| FASTML_Γ | 18,524                       | 153.51%           | 0.0659               | 7.22%                         | 486                    | 0.00%                   | 546                    | 0.55%                   | 1,221      | 135.21%             |
| PAML     | 19,352                       | 164.84%           | 0.0768               | 8.09%                         | 486                    | 0.00%                   | 546                    | 0.55%                   | 1,486      | 186.26%             |
| PHYLO_Γ  | 19,352                       | 164.84%           | 0.0768               | 8.09%                         | 486                    | 0.00%                   | 546                    | 0.55%                   | 1,486      | 186.26%             |
| MP       | 18,276                       | 150.12%           | 0.0656               | 7.60%                         | 486                    | 0.00%                   | 546                    | 0.55%                   | 1,199      | 131.11%             |
| 23       | 16,329                       | -                 | 0.0803               | -                             | 486                    | -                       | 546                    | -                       | 1,312      | -                   |
| PAML_Γ   | 16,443                       | 0.70%             | 0.0770               | 4.18%                         | 486                    | 0.00%                   | 546                    | 0.00%                   | 1,266      | 3.51%               |
| FASTML_Γ | 16,443                       | 0.70%             | 0.0770               | 4.18%                         | 486                    | 0.00%                   | 546                    | 0.00%                   | 1,266      | 3.51%               |
| PAML     | 20,125                       | 23.25%            | 0.0809               | 0.74%                         | 486                    | 0.00%                   | 546                    | 0.00%                   | 1,628      | 24.16%              |
| PHYLO_Γ  | 20,125                       | 23.25%            | 0.0809               | 0.74%                         | 486                    | 0.00%                   | 546                    | 0.00%                   | 1,628      | 24.16%              |
| MP       | 18,353                       | 12.40%            | 0.0773               | 3.71%                         | 486                    | 0.00%                   | 546                    | 0.00%                   | 1,419      | 8.23%               |
| 24       | 24,473                       | -                 | 0.0713               | -                             | 512                    | -                       | 560                    | -                       | 1,745      | -                   |
| PAML_Γ   | 26,404                       | 7.89%             | 0.0831               | 16.49%                        | 511                    | 0.20%                   | 560                    | 0.00%                   | 2,193      | 25.69%              |
| FASTML_Γ | 26,404                       | 7.89%             | 0.0831               | 16.49%                        | 511                    | 0.20%                   | 560                    | 0.00%                   | 2,193      | 25.69%              |
| PAML     | 26,404                       | 7.89%             | 0.0831               | 16.49%                        | 511                    | 0.20%                   | 560                    | 0.00%                   | 2,193      | 25.69%              |
| PHYLO_Γ  | 25,695                       | 4.99%             | 0.0805               | 12.87%                        | 512                    | 0.00%                   | 561                    | 0.18%                   | 2,068      | 18.50%              |
| MP       | 25,486                       | 4.14%             | 0.0769               | 7.93%                         | 512                    | 0.00%                   | 560                    | 0.00%                   | 1,961      | 12.40%              |
| 25       | 17,857                       | -                 | 0.0868               | -                             | 373                    | -                       | 452                    | -                       | 1,550      | -                   |
| PAML_Γ   | 11,018                       | 38.30%            | 0.1036               | 19.39%                        | 399                    | 6.97%                   | 451                    | 0.22%                   | 1,142      | 26.34%              |
| FASTML_Γ | 11,018                       | 38.30%            | 0.1036               | 19.39%                        | 399                    | 6.97%                   | 451                    | 0.22%                   | 1,142      | 26.34%              |
| PAML     | 24,857                       | 39.20%            | 0.0989               | 13.90%                        | 400                    | 7.24%                   | 451                    | 0.22%                   | 2,458      | 58.55%              |
| PHYLO_Γ  | 24,857                       | 39.20%            | 0.0989               | 13.90%                        | 400                    | 7.24%                   | 451                    | 0.22%                   | 2,458      | 58.55%              |
| MP       | 11,018                       | 38.30%            | 0.1036               | 19.39%                        | 399                    | 6.97%                   | 451                    | 0.22%                   | 1,142      | 26.34%              |
| 26       | 25,592                       | -                 | 0.0720               | -                             | 512                    | -                       | 560                    | -                       | 1,842      | -                   |
| PAML_Γ   | 25,592                       | 0.00%             | 0.0720               | 0.00%                         | 512                    | 0.00%                   | 560                    | 0.00%                   | 1,842      | 0.00%               |
| FASTML_Γ | 25,592                       | 0.00%             | 0.0720               | 0.00%                         | 512                    | 0.00%                   | 560                    | 0.00%                   | 1,842      | 0.00%               |
| PAML     | 22,798                       | 10.92%            | 0.0756               | 5.08%                         | 511                    | 0.20%                   | 560                    | 0.00%                   | 1,725      | 6.39%               |
| PHYLO_Γ  | 26,469                       | 3.43%             | 0.0708               | 1.64%                         | 512                    | 0.00%                   | 560                    | 0.00%                   | 1,874      | 1.74%               |
| MP       | 25,486                       | 0.41%             | 0.0769               | 6.89%                         | 512                    | 0.00%                   | 560                    | 0.00%                   | 1,961      | 6.45%               |
| 27       | 18,419                       | -                 | 0.0758               | -                             | 486                    | -                       | 546                    | -                       | 1,396      | -                   |
| PAML_Γ   | 20,125                       | 9.26%             | 0.0809               | 6.78%                         | 486                    | 0.00%                   | 546                    | 0.00%                   | 1,628      | 16.67%              |
| FASTML_Γ | 20,125                       | 9.26%             | 0.0809               | 6.78%                         | 486                    | 0.00%                   | 546                    | 0.00%                   | 1,628      | 16.67%              |
| PAML     | 20,125                       | 9.26%             | 0.0809               | 6.78%                         | 486                    | 0.00%                   | 546                    | 0.00%                   | 1,628      | 16.67%              |
| PHYLO_Γ  | 20,125                       | 9.26%             | 0.0809               | 6.78%                         | 486                    | 0.00%                   | 546                    | 0.00%                   | 1,628      | 16.67%              |
| MP       | 16,939                       | 8.04%             | 0.0744               | 1.75%                         | 486                    | 0.00%                   | 546                    | 0.00%                   | 1,261      | 9.64%               |
| 28       | 17,288                       | -                 | 0.0769               | -                             | 486                    | -                       | 545                    | -                       | 1,329      | -                   |
| PAML_Γ   | 18,524                       | 7.15%             | 0.0659               | 14.28%                        | 486                    | 0.00%                   | 546                    | 0.18%                   | 1,221      | 8.15%               |
| FASTML_Γ | 18,524                       | 7.15%             | 0.0659               | 14.28%                        | 486                    | 0.00%                   | 546                    | 0.18%                   | 1,221      | 8.15%               |
| PAML     | 18,524                       | 7.15%             | 0.0659               | 14.28%                        | 486                    | 0.00%                   | 546                    | 0.18%                   | 1,221      | 8.15%               |
| PHYLO_Γ  | 15,953                       | 7.72%             | 0.0753               | 2.01%                         | 486                    | 0.00%                   | 546                    | 0.18%                   | 1,202      | 9.58%               |



|          |        |         |        |           |     |        |     |        |        |           |
|----------|--------|---------|--------|-----------|-----|--------|-----|--------|--------|-----------|
| MP       | 18,276 | 5.71%   | 0.0656 | 14.63%    | 486 | 0.00%  | 546 | 0.18%  | 1,199  | 9.75%     |
| 29       | 18,034 | -       | 0.0803 | -         | 487 | -      | 547 | -      | 1,448  | -         |
| PAML_Γ   | 17,102 | 5.17%   | 0.0775 | 3.54%     | 487 | 0.00%  | 547 | 0.00%  | 1,325  | 8.53%     |
| FASTML_Γ | 17,102 | 5.17%   | 0.0775 | 3.54%     | 487 | 0.00%  | 547 | 0.00%  | 1,325  | 8.53%     |
| PAML     | 17,102 | 5.17%   | 0.0775 | 3.54%     | 487 | 0.00%  | 547 | 0.00%  | 1,325  | 8.53%     |
| PHYLO_Γ  | 19,237 | 6.67%   | 0.0815 | 1.43%     | 486 | 0.21%  | 547 | 0.00%  | 1,567  | 8.20%     |
| MP       | 18,034 | 0.00%   | 0.0803 | 0.00%     | 487 | 0.00%  | 547 | 0.00%  | 1,448  | 0.00%     |
| 30       | 26,360 | -       | 0.2398 | -         | 586 | -      | 606 | -      | 6,322  | -         |
| PAML_Γ   | 32,151 | 21.97%  | 0.2486 | 3.67%     | 586 | 0.00%  | 604 | 0.33%  | 7,993  | 26.44%    |
| FASTML_Γ | 32,151 | 21.97%  | 0.2486 | 3.67%     | 586 | 0.00%  | 604 | 0.33%  | 7,993  | 26.44%    |
| PAML     | 32,151 | 21.97%  | 0.2486 | 3.67%     | 586 | 0.00%  | 604 | 0.33%  | 7,993  | 26.44%    |
| PHYLO_Γ  | 37,090 | 40.71%  | 0.2489 | 3.77%     | 585 | 0.17%  | 605 | 0.17%  | 9,231  | 46.01%    |
| MP       | 39,835 | 51.12%  | 0.2547 | 6.19%     | 586 | 0.00%  | 605 | 0.17%  | 10,145 | 60.48%    |
| 31       | 36,941 | -       | 0.2528 | -         | 584 | -      | 602 | -      | 9,339  | -         |
| PAML_Γ   | 33,535 | 9.22%   | 0.2514 | 0.54%     | 584 | 0.00%  | 604 | 0.33%  | 8,431  | 9.71%     |
| FASTML_Γ | 33,535 | 9.22%   | 0.2514 | 0.54%     | 584 | 0.00%  | 604 | 0.33%  | 8,431  | 9.71%     |
| PAML     | 45,841 | 24.09%  | 0.2437 | 3.60%     | 585 | 0.17%  | 605 | 0.50%  | 11,171 | 19.62%    |
| PHYLO_Γ  | 45,841 | 24.09%  | 0.2437 | 3.60%     | 585 | 0.17%  | 605 | 0.50%  | 11,171 | 19.62%    |
| MP       | 49,196 | 33.17%  | 0.2527 | 0.03%     | 585 | 0.17%  | 605 | 0.50%  | 12,433 | 33.14%    |
| 32       | 38,038 | -       | 0.2527 | -         | 586 | -      | 608 | -      | 9,614  | -         |
| PAML_Γ   | 31,981 | 15.92%  | 0.2483 | 1.76%     | 585 | 0.17%  | 604 | 0.66%  | 7,941  | 17.40%    |
| FASTML_Γ | 31,981 | 15.92%  | 0.2483 | 1.76%     | 585 | 0.17%  | 604 | 0.66%  | 7,941  | 17.40%    |
| PAML     | 31,981 | 15.92%  | 0.2483 | 1.76%     | 585 | 0.17%  | 604 | 0.66%  | 7,941  | 17.40%    |
| PHYLO_Γ  | 28,842 | 24.18%  | 0.2616 | 3.52%     | 585 | 0.17%  | 605 | 0.49%  | 7,546  | 21.51%    |
| MP       | 31,981 | 15.92%  | 0.2483 | 1.76%     | 585 | 0.17%  | 604 | 0.66%  | 7,941  | 17.40%    |
| 33       | 30,069 | -       | 0.2572 | -         | 584 | -      | 604 | -      | 7,733  | -         |
| PAML_Γ   | 30,873 | 2.67%   | 0.2178 | 15.31%    | 583 | 0.17%  | 604 | 0.00%  | 6,724  | 13.05%    |
| FASTML_Γ | 30,873 | 2.67%   | 0.2178 | 15.31%    | 583 | 0.17%  | 604 | 0.00%  | 6,724  | 13.05%    |
| PAML     | 30,873 | 2.67%   | 0.2178 | 15.31%    | 583 | 0.17%  | 604 | 0.00%  | 6,724  | 13.05%    |
| PHYLO_Γ  | 30,873 | 2.67%   | 0.2178 | 15.31%    | 583 | 0.17%  | 604 | 0.00%  | 6,724  | 13.05%    |
| MP       | 30,873 | 2.67%   | 0.2178 | 15.31%    | 583 | 0.17%  | 604 | 0.00%  | 6,724  | 13.05%    |
| 34       | 26,491 | -       | 0.0019 | -         | 402 | -      | 512 | -      | 51     | -         |
| PAML_Γ   | 30,213 | 14.05%  | 0.2326 | 11927.88% | 584 | 45.27% | 604 | 17.97% | 7,028  | 13617.80% |
| FASTML_Γ | 30,213 | 14.05%  | 0.2326 | 11927.88% | 584 | 45.27% | 604 | 17.97% | 7,028  | 13617.80% |
| PAML     | 30,213 | 14.05%  | 0.2326 | 11927.88% | 584 | 45.27% | 604 | 17.97% | 7,028  | 13617.80% |
| PHYLO_Γ  | 30,213 | 14.05%  | 0.2326 | 11927.88% | 584 | 45.27% | 604 | 17.97% | 7,028  | 13617.80% |
| MP       | 30,213 | 14.05%  | 0.2326 | 11927.88% | 584 | 45.27% | 604 | 17.97% | 7,028  | 13617.80% |
| 35       | 8,629  | -       | 0.0069 | -         | 585 | -      | 605 | -      | 60     | -         |
| PAML_Γ   | 30,213 | 250.13% | 0.2326 | 3270.90%  | 584 | 0.17%  | 604 | 0.17%  | 7,028  | 11702.63% |
| FASTML_Γ | 30,213 | 250.13% | 0.2326 | 3270.90%  | 584 | 0.17%  | 604 | 0.17%  | 7,028  | 11702.63% |
| PAML     | 30,213 | 250.13% | 0.2326 | 3270.90%  | 584 | 0.17%  | 604 | 0.17%  | 7,028  | 11702.63% |
| PHYLO_Γ  | 31,380 | 263.66% | 0.2481 | 3496.06%  | 583 | 0.34%  | 603 | 0.33%  | 7,787  | 12977.33% |
| MP       | 30,213 | 250.13% | 0.2326 | 3270.90%  | 584 | 0.17%  | 604 | 0.17%  | 7,028  | 11702.63% |
| 36       | 24,031 | -       | 0.0010 | -         | 406 | -      | 511 | -      | 23     | -         |
| PAML_Γ   | 25,263 | 5.13%   | 0.0010 | 1.54%     | 400 | 1.48%  | 511 | 0.00%  | 25     | 6.75%     |
| FASTML_Γ | 27,819 | 15.76%  | 0.0011 | 12.79%    | 400 | 1.48%  | 511 | 0.00%  | 30     | 30.57%    |
| PAML     | 27,819 | 15.76%  | 0.0011 | 12.79%    | 400 | 1.48%  | 511 | 0.00%  | 30     | 30.57%    |
| PHYLO_Γ  | 27,819 | 15.76%  | 0.0011 | 12.79%    | 400 | 1.48%  | 511 | 0.00%  | 30     | 30.57%    |
| MP       | 27,266 | 13.46%  | 0.0021 | 119.23%   | 400 | 1.48%  | 511 | 0.00%  | 57     | 148.74%   |
| 37       | 39,333 | -       | 0.2905 | -         | 584 | -      | 604 | -      | 11,425 | -         |
| PAML_Γ   | 49,835 | 26.70%  | 0.2904 | 0.04%     | 584 | 0.00%  | 603 | 0.17%  | 14,470 | 26.65%    |
| FASTML_Γ | 49,835 | 26.70%  | 0.2904 | 0.04%     | 584 | 0.00%  | 603 | 0.17%  | 14,470 | 26.65%    |
| PAML     | 49,835 | 26.70%  | 0.2904 | 0.04%     | 584 | 0.00%  | 603 | 0.17%  | 14,470 | 26.65%    |
| PHYLO_Γ  | 49,835 | 26.70%  | 0.2904 | 0.04%     | 584 | 0.00%  | 603 | 0.17%  | 14,470 | 26.65%    |
| MP       | 49,835 | 26.70%  | 0.2904 | 0.04%     | 584 | 0.00%  | 603 | 0.17%  | 14,470 | 26.65%    |

**b**

| Leaf | $\epsilon(M^{-1}cm^{-1})$ | $\Phi$ | $\lambda_{ex}(nm)$ | $\lambda_{em}(nm)$ | Brightness |
|------|---------------------------|--------|--------------------|--------------------|------------|
| 1    | 43,663                    | 0.2819 | 585                | 604                | 12,309     |
| 2    | 50,293                    | 0.2837 | 584                | 602                | 14,270     |
| 3    | 26,750                    | 0.0036 | 398                | 511                | 96         |
| 4    | 26,759                    | 0.0052 | 425                | 513                | 140        |
| 5    | 61,727                    | 0.2717 | 584                | 605                | 16,773     |
| 6    | 38,793                    | 0.2541 | 584                | 605                | 9,858      |
| 7    | 30,084                    | 0.0008 | 497                | 511                | 24         |
| 8    | 19,474                    | 0.0747 | 580                | 604                | 1,455      |
| 9    | 8,572                     | 0.2321 | 589                | 609                | 1,990      |
| 10   | 46,478                    | 0.2412 | 584                | 603                | 11,208     |
| 11   | 27,193                    | 0.0544 | 509                | 557                | 1,480      |
| 12   | 17,339                    | 0.1335 | 486                | 532                | 2,314      |
| 13   | 11,352                    | 0.0716 | 486                | 548                | 813        |
| 14   | 17,366                    | 0.0951 | 486                | 543                | 1,651      |
| 15   | 13,477                    | 0.0939 | 486                | 533                | 1,265      |
| 16   | 23,978                    | 0.0061 | 510                | 565                | 145        |
| 17   | 25,406                    | 0.1648 | 512                | 556                | 4,186      |
| 18   | 29,356                    | 0.1348 | 398                | 451                | 3,956      |
| 19   | 10,572                    | 0.1038 | 399                | 450                | 1,097      |

**c**

| Method   | $\epsilon$<br>Average Error | $\Phi$<br>Average Error | Brightness<br>Average Error |
|----------|-----------------------------|-------------------------|-----------------------------|
| PAML_Γ   | 26.31%                      | 13.75%                  | 41.89%                      |
| FASTML_Γ | 27.02%                      | 14.50%                  | 43.48%                      |
| PAML     | 31.06%                      | 14.51%                  | 51.49%                      |
| PHYLO_Γ  | 32.31%                      | 13.20%                  | 52.36%                      |
| MP       | 33.73%                      | 20.87%                  | 60.79%                      |

Nodes 34 and 35 not included due to being outliers

## Supplementary Note 1

### Amino acid sequences for the 37 proteins at the leaves and nodes in the experimental phylogeny.

>01

MASSEDVIKEFMRFRVSMEGSINGHEFEIEGEGEGRPEYEGTQTAKLRVTKGGPLPFAWDILSPQF  
QYGSKAYVKHPADIPDYKLSFPEGFKWERVMNFEDGGVVTVTQDSTLQDGVLIYKVKLHGINFP  
SDGPVMQKKTRGWEASTERMYPEDGVLKGEIKMRLKLDGSHYEAVVKTSYMAKKPVQLPGAYIT  
DIKLDITSHNEDYTIVEQYERAAGRSTGA

>02

MASSEDVIKEFMRFKVSMEGSVNGHEFEIEGDGEGRPEYEGTQSACLKVTGGPLPFAWDILSPQF  
QYGSKAYVKHPADIPDYKLSFPEGFKWERVMNFEDGGVVTVTQDSTLRDGIYKVKLHGTFNP  
SDGPVMQKKTRGWEASTERMYPEDGVLKGEIKMRLKLINGSHYKAEVKTYYIAKKPVQLPGAYKT  
DIKLDITSHNEDYTIVEQYERAAGRSTGA

>03

MASSEDVIKEFMRFKVYLEGSVNGHEFEIEGEGEGLPEYEGTQVAKLRVTKGGPLPFAWDILSPQF  
QYGSKAYVKHPADIPDYMKLSFPEGFRWDRIMNFEDGGVVTVIQDTSLRDGEFICKVKLRTDFP  
SEGPVMQKQTMGWEASTERMYPDGGMLRGEDNMRLRLKDGGHYAYVVRTTYMAKKPVQLPDAYTI  
DIKLDVTSNEDYTIVEQYERAAGRSTGA

>04

MASSEDVIKEFMRFKVYLEGSVNGHEFEIEGEGEGRPEYEGTQVAKLRVTKGGPLPFAWDILSPQF  
QYGSKAYVKHPADIPDYMKLSFPEGFKWDRVMKFEDGGVVTVTQDTSLQNGEFICKVKLRTGTFP  
SEGPVMQKQTMGWEASTERMYPEDGALKGEDTMCLRLKDGGHYDAYIKTTYMAKKPVQLPGAYIV  
DIKLDVTSNEDYTIVEQYERAAGRSTGA

>05

MASSEDVIKEFMRFKVYLEGSVNGHEFEIEGEGEGRPEYEGTQVAKLKVTKGGPLPFAWDILSPQF  
QYGSKAYVKHPADIPDYMKLSFPEGFRWERVMKFEDGGVVTVTQDTSLQDGEFIYKVKLHGTFP  
SEGPVVQKQTMGWEASTERMYPEDGALKGEIKMRLRLKGGGQYEADVKTYYMAKKPVQLPGAYIT  
DIKLDITYHNEDYTIVEQYERAAGRSTGA

>06

MASSEDVIKEFMRFKVYLEGSVNGHEFEIEGVGEGRPEYEGTQVAKLKVTKGGPLPFSWDILSPQF  
QYGSKAYVKHPADIPDYMKLSFPEGFKWDRVMNFEDDGVVIVSQDTSLQNGEFYKVKLRGIDFP  
SEGPVMQKQTMGWEASAERMYPEDGALKGEVKMRLRLKDGGHYADVKTYYMAKKPVLLPGAYIT  
DIKLDIISHNEDYTIVEQYERAAGRSTGA

>07

MASSEDVIKEFMRFKVYMEGSVNGHEFEIEGEGEGRPEYEGTQAAKLKVTKGCPLPFAWDILSPQF  
QYGSKAYVKHPADIPDYMKLSFPEGLKWDRVMKFEDGGIVTVTQDSSLQDGVFIHKVKVRGTFP  
SDGPVMRKQTMGWEASIDRMYPEDGLLKGEAKMRLKLKNGGHYDAEVKTYYMAKKQVQLPGAYII  
DIKLDITSHNDDYTIVEQYERAAGRSTGA

>08

MASSEDVIKEFMRFKVYMEGSVNGHEFEIEGEGEGRPEYEGTQAAKLKVTKGGPLPFAWDILSPQF  
QYGSKAYVKHPSDIPDYMKLSFPEGFKWGRVMKFEDGGVVTVTQDSSLQDGVFIYKVKLHGTMNFP  
SDGPVMQKQTMGWEASIERMYPEDGSLKGEAKMRLKLKNGGNYDAEVKTYYMAKKSQVQLPGAYIII  
DTKLDITSHNEDYTIVEQYERAAGRSTGA

>09

MASSEDVIKEFMRFKVCMKGSVNGHVFEIEGEGEGRPYEGTQSVKLVTKGGPLPFAWDILSPQF  
QYGSKAYVKHPANIPDYVKLSFPEGLKWRIMNFEDGGVTVTHDSSLQDGEFIYKVRLVGIDFP  
SDGPVMQKRTMGWEASTERMYPEDGALKGSVKMRLKLDGGHYNAEVNTTYMAKKPVQLPGAYIT  
DIKLDITSHNDDYTVVEQYERAEGRHSTGA

>10

MASSEDVIKEFMRFKVSMEGSVNGHEFEIEGVGEGRPYEGTQSAKLVTKGGPLPFAWDILSPQF  
QYGSKVYVKHPADIPDYKLSFPEGFKWIRIMNFEDGGVTVTQDSSLQDGVFIYKVKLHGIDFP  
SDGPVMQKQTMGWEASTERMYPEDGALQGAVKMRLKLDGGRYGAEVKTTYMAKKHVQLPGAYLT  
DIKLDITSHNDDYTIVEQYERAEGRHSTGA

>11

MASSEDVIKDFMRFVRMEGSVNGHEFEIEGEGEGHPYEGTQSAKLVTKGGPLPFAWDILSPQF  
MWGSKAYVKHPVDIPDYMKLSFPEGFKWERVMNFEDGGVIVTQDSSLQDGEFVYEVRLCGTNFP  
SDGPVMQKKTMGCAAFSERIYSEDGALKGEVKMRLRLKGDGDHYEAEVNTTYKAKKAVQLPDAYII  
YGKLDIISHNEDYTIVEQYERAEGRHSTGA

>12

MASSEDVIKEFMRFKVRMEGSVNGHEFEIEGEGAGRPYEGTQAAKLVKVIKGGPLPFAWDILSPQL  
MWGSKAYVKHPADIPDYMKLSFPEGFKWERVMI FEDGGVLTVTQDSSLQDGEFIYKVRLCGTNFP  
SDGPVMQKRTMGCAAI SERTYPEDGALKGEVKMRLRLKDDGDHYEAEVKTTYMAKKTVQLPDAYII  
DGKLDIISHNEDYTIVEQYERAEGRHSTGA

>13

MASSEDVIKEFMRFKVRMVGSVNGHEFEIEGEGEGRPYEGTQAAKLVTKGGPLPFAWDILSPQF  
MWGSKAYVKHPADIPDYMKLSFPEGFRWERVMI FEDGGVTVTQDSSLQDGEFIYEVKLCGTNFP  
SDGPVMQKKTMGCAAI SERIYPKDGALKGEVVMRLRLKDDGDHYVAEVKTTYTAKQAVPLPDAYII  
DGKLDIISYNEDYTIVEQYERAEGRHSTGA

>14

MASSEDVIKEFMRFKVRMEGSVNGHEFEIEGEGEGRPYEGTQTAKLVTKGGPLPFSWDILSPQF  
MWGSKAYVKHPADIPDYMKLSFPEGFKWDRVMI FEDGGVTVTQDSSLQDGVLIYKVKVRGTNFP  
SDGPVMQKKTMGCAAI SERVYPEDGALKGRVKMRLRLKDDDYDAEVSTTYMAKKLVQLPDAYNI  
DGKLDIISHNKDYTIVEQYERAEARHSTGV

>15

MASSEDVIKEFMRFKVRMEGSVNGHEFEIEGEGEGRPYEGTQTAKLVTKGGPLPFSWDILSPQF  
MWGSKAYVKHPADIPDYMKLSFPEGFKWDRVMNFEDGGVIVTHDSSLQDGVFIYKVKLCGTNFP  
SVGPVMQKRTMGCAAI SERIYPEDGALKGEVKMRLRLKDDGGHYGAEVNTTYMAKKTVQLPGAYEI  
DGKLDIISHNEDYTIVEQYERAEGRHSTGA

>16

MASSEDVIKEFMRYKVRMVGSVNGHEFEIKGEGEGRPYEGTQTAILKVTGGPLPFSWDILSPQF  
MWGSKAYVKHSADIPDYMKLSFPEGFKWYRVMNFEDGGVITVTHDSSLHDGEFINEVKLRGTNFP  
SDGPVMQKKTGCAAFSEHIYPEDGALKGDVIMRLRLLEDGDHYVAEVSTAYIAKKRVQLPDAYKI  
DGKLDIISHNEDYTIVEQYERAEGRHSIGA

>17

MASSEDVIKEFMRYKVRMEGSVNGHEFEIEGEGKGRPYEGTQTAKLVTKGGPLPFSWDILSPQF  
MWGSKAYVKHPADIPDYMKLSFPEGFKWYRVMNFEDGGVTVTQDSSLQDGFYEVKLRGINFP  
SDGPVMQKKTMGCAAFSELTYPEDGALKGDVIMRLRLKDRHYNAEVSTTYMAKKSQVQLPDAYII  
DGKLDIISHNEDYTIVEQYERAEGRHFTGA

>18

MASSEDVIKEFMRYKVRMEGSVNGHEFEIEGVGEGRPYEGTQTAKLSVTKGGPLPFSWDILSPQF  
MWGSKTYVKHPPDIPDYMKQSFPEGFRWYRVMNFEDGGVITVTQDSSLQDGKFTYEVKLGHTNFP  
SHGPVMQKKTNGYAAFSEIRIYPVDGALKGDVIMRLRLKDGNDHYDAQVSTIYMAKKTVQLPDEYKI  
NGKLDITSHNEDYTIVEQYERAEGRHSTGA

>19

MASSEDVIKEFMRYKVRMEGSINGHEFEIEGVGEGRPYEGTQTAKLRVTRGGPLPFSWDILSPQF  
MWGSKTYVKHPSDIPDYMKLSFPEGFRWYRVMNFEDGGVITVTQDSSLQDGFEIYEVKLGHTNFP  
SYGPVMQKKTIGYAAFSEIRIYPVDGALKGDVIMRLRLKDGSHYDAEVRTTYMAKKTVQLPEEYKI  
DGKLDITSHNEDYTIVEQYERAEGRHSTGA

>21

MASSEDVIKEFMRFKVRMEGSVNGHEFEIEGEGEGRPYEGTQAAKLKVTGGPLPFAWDILSPQF  
QYGSKAYVKHPADIPDYMKLSFPEGFKWDRVMNFEDGGVVTVTQDSSLQDGFEIYKVKLRGTNFP  
SDGPVMQKKTIMGWEASTERMYPEDGALKGEVKMRLRLKDGHDHYDAEVNTTYMAKPPVQLPGAYKT  
DVKLDITSHNEDYTIVEQYERAEGRHSTGA

>22

MASSEDVIKEFMRFKVRMEGSVNGHEFEIEGEGEGRPYEGTQAAKLKVTGGPLPFAWDILSPQF  
MWGSKAYVKHPADIPDYMKLSFPEGFKWDRVMNFEDGGVVTVTQDSSLQDGFEIYEVKLRGTNFP  
SDGPVMQKKTIMGCAAI SERIYSEDGALKGEVKMRLRLKDGHDHYDAEVNTTYMAKKTVQLPDAYKI  
DGKLDIISHNEDYTIVEQYERAEGRHSTGA

>23

MASSEDVIKEFMRFKVRMEGSVNGHEFEIEGEGEGRPYEGTQTAKLKVTGGPLPFSWDILSPQF  
MWGSKAYVKHPADIPDYMKLSFPEGFKWDRVMNFEDGGVVTVTQDSSLQDGFEIYEVKLRGTNFP  
SDGPVMQKKTIMGCAAI SERIYPEDGALKGEVKMRLRLKDGHDHYDAEVSTTYMAKKTVQLPDAYKI  
DGKLDIISHNEDYTIVEQYERAEGRHSTGA

>24

MASSEDVIKEFMRYKVRMEGSVNGHEFEIEGEGEGRPYEGTQTAKLKVTGGPLPFSWDILSPQF  
MWGSKAYVKHPADIPDYMKLSFPEGFKWYRVMNFEDGGVVTVTQDSSLQDGFEIYEVKLRGTNFP  
SDGPVMQKKTIMGCAAFSEIRIYPEDGALKGDVIMRLRLKDGHDHYDAEVSTTYMAKKTVQLPDAYKI  
DGKLDITSHNEDYTIVEQYERAEGRHSTGA

>25

MASSEDVIKEFMRYKVRMEGSVNGHEFEIEGEGEGRPYEGTQTAKLRVTKGGPLPFSWDILSPQF  
MWGSKTYVKHPADIPDYMKLSFPEGFRWYRVMNFEDGGVITVTQDSSLQDGKFIYEVKLRGTNFP  
SYGPVMQKKTIGYAAFSEIRIYPEDGALKGDVIMRLRLKDGHDHYDAEVSTTYMAKKTVQLPDEYKI  
DGKLDITSHNEDYTIVEQYERAEGRHSTGA

>26

MASSEDVIKEFMRYKVRMEGSVNGHEFEIEGEGEGRPYEGTQTAKLKVTGGPLPFSWDILSPQF  
MWGSKAYVKHPADIPDYMKLSFPEGFKWYRVMNFEDGGVVTVTQDSSLQDGFEIYEVKLRGTNFP  
SDGPVMQKKTIMGCAAFSEIRIYPEDGALKGDVIMRLRLKDGHDHYDAEVSTTYMAKKTVQLPDAYKI  
DGKLDIISHNEDYTIVEQYERAEGRHSTGA

>27

MASSEDVIKEFMRFKVRMEGSVNGHEFEIEGEGEGRPYEGTQTAKLKVTGGPLPFSWDILSPQF  
MWGSKAYVKHPADIPDYMKLSFPEGFKWDRVMNFEDGGVVTVTQDSSLQDGVFIYEVKLRGTNFP  
SDGPVMQKKTIMGCAAI SERIYPEDGALKGEVKMRLRLKDGHDHYDAEVSTTYMAKKTVQLPDAYKI  
DGKLDIISHNEDYTIVEQYERAEGRHSTGA



>28

MASSEDVIKEFMRFKVRMEGSVNGHEFEIEEGEGEGRPYEGTQAAKLKVTKGGPLPFAWDILSPQF  
MWGSKAYVKHPADIPDYMKLSFPEGFKWERVMNFEDGGVVTVTQDSSLQDGEFIYEVKLCGTNFP  
SDGPVMQKKTMTGCAAI SERIYSEDGALKGEVKMRLRLKDGHDHYDAEVNTTYMAKKTVQLPDAYII  
DGKLDIISHNEDYTIVEQYERAEGRHSTGA

>29

MASSEDVIKEFMRFKVRMEGSVNGHEFEIEEGEGEGRPYEGTQAAKLKVTKGGPLPFAWDILSPQF  
MWGSKAYVKHPADIPDYMKLSFPEGFKWERVMI FEDGGVVTVTQDSSLQDGEFIYEVKLCGTNFP  
SDGPVMQKKTMTGCAAI SERIYPEDGALKGEVKMRLRLKDGHDHYEAEVKT TYMAKKTVQLPDAYII  
DGKLDIISHNEDYTIVEQYERAEGRHSTGA

>30

MASSEDVIKEFMRFKVCMEGSVNGHEFEIEEGEGEGRPYEGTQAAKLKVTKGGPLPFAWDILSPQF  
QYGSKAYVKHPADIPDYMKLSFPEGFKWDRVMNFEDGGVVTVTQDSSLQDGEFIYKVKLRGTDFP  
SDGPVMQKQTMGWEASTERMYPEDGALKGGVKMRLKLDGGHYDAEVNTTYMAKKPVQLPGAYIT  
DIKLDITSHNEDYTIVEQYERAEGRHSTGA

>31

MASSEDVIKEFMRFKVCMEGSVNGHEFEIEEGEGEGRPYEGTQSAKLKVTKGGPLPFAWDILSPQF  
QYGSKVYVKHPADIPDYVKLSFPEGFKWVRIMNFEDGGVVTVTQDSSLQDGEFIYKVKLRHGIDFP  
SDGPVMQKQTMGWEASTERMYPEDGALKGAVKMRLKLDGGHYDAEVNTTYMAKKPVQLPGAYIT  
DIKLDITSHNDDYTIVEQYERAEGRHSTGA

>32

MASSEDVIKEFMRFKVCMEGSVNGHEFEIEEGEGEGRPYEGTQAAKLKVTKGGPLPFAWDILSPQF  
QYGSKAYVKHPADIPDYMKLSFPEGFKWDRVMNFEDGGVVTVTQDSSLQDGEFIYKVKLRGTDFP  
SDGPVMQKQTMGWEASTERMYPEDGALKGEVKMRLKLDGGHYDAEVKT TYMAKKPVQLPGAYIT  
DIKLDITSHNEDYTIVEQYERAEGRHSTGA

>33

MASSEDVIKEFMRFKVCMEGSVNGHEFEIEEGEGEGRPYEGTQAAKLKVTKGGPLPFAWDILSPQF  
QYGSKAYVKHPADIPDYMKLSFPEGFKWDRVMK FEDGGVVTVTQDSSLQDGVFIYKVKLRGTDFP  
SDGPVMQKQTMGWEASIERMYPEDGLLKGEAKMRLKLDGGHYDAEVKT TYMAKKPVQLPGAYIT  
DIKLDITSHNEDYTIVEQYERAEGRHSTGA

>34

MASSEDVIKEFMRFKVYLEGSVNGHEFEIEEGEGEGRPYEGTQVAKLKVTKGGPLPFAWDILSPQF  
QYGSKAYVKHPADIPDYMKLSFPEGFKWDRVMNFEDGGVVTVTQDTSLQDGEFICKVKLRGTDFP  
SEGPVMQKQTMGWEASTERMYPEDGALKGEDKMRLRLKDGGHYDADVKT TYMAKKPVQLPGAYIT  
DIKLDITSHNEDYTIVEQYERAEGRHSTGA

>35

MASSEDVIKEFMRFKVYLEGSVNGHEFEIEEGEGEGRPYEGTQVAKLKVTKGGPLPFAWDILSPQF  
QYGSKAYVKHPADIPDYMKLSFPEGFKWDRVMNFEDGGVVTVTQDTSLQDGEFIYKVKLRGTDFP  
SEGPVMQKQTMGWEASTERMYPEDGALKGEDKMRLRLKDGGHYDADVKT TYMAKKPVQLPGAYIT  
DIKLDITSHNEDYTIVEQYERAEGRHSTGA

>36

MASSEDVIKEFMRFKVYLEGSVNGHEFEIEEGEGEGRPYEGTQVAKLRVTKGGPLPFAWDILSPQF  
QYGSKAYVKHPADIPDYMKLSFPEGFKWDRVMNFEDGGVVTVTQDTSLQDGEFICKVKLRGTDFP  
SEGPVMQKQTMGWEASTERMYPEDGVLKGEDKMRLRLKDGGHYDAYVKT TYMAKKPVQLPGAYIT  
DIKLDVTSHNEDYTIVEQYERAEGRHSTGA

>37

MASSEDVIKEFMRFKVSMEGSVNGHEFEIEGEGEGRPYEGTQTAKLKVTKGGPLPFAWDILSPQF  
QYGSKAYVKHPADIPDYLKLSFPEGFKWERVMNFEDGGVVTVTQDSTLQDGVLIYKVKLRGTNFP  
SDGPVMQKKTRGWEASTERMYPEDGVLKGEIKMRLKLDGSHYEAEVKTTYMAKKPVQLPGAYKT  
DIKLDITSHNEDYTIVEQYERAEGRHSTGA
